# Supplementary material for: Ti-doped α-Fe2O3 nanorods with controllable morphology by carbon layer coating for enhanced photoelectrochemical water oxidation
Source: Royal Society of Chemistry journal article supplement (doi:10.1039/c7dt00850c), 2017-01-01
Supplement: c7dt00850c1.pdf [file c7dt00850c1.pdf]

*Supporting Information*

**Ti-doped  $\alpha$ -Fe<sub>2</sub>O<sub>3</sub> nanorods with controllable morphology by carbon layer coating for enhanced photoelectrochemical water oxidation**

Dejian Yan,<sup>a</sup> Jikai Liu,<sup>\*a,b</sup> Zhichao Shang,<sup>a</sup> He'an Luo<sup>\*a,b</sup>

a. School of Chemical Engineering, Xiangtan University, Xiangtan 411105, P. R. China.

b. National and Local United Engineering Research Center for Chemical Process Simulation and Intensification, Xiangtan University, Xiangtan 411105, P. R. China.

Email: jikailiu@xtu.edu.cn; heanluo@126.com

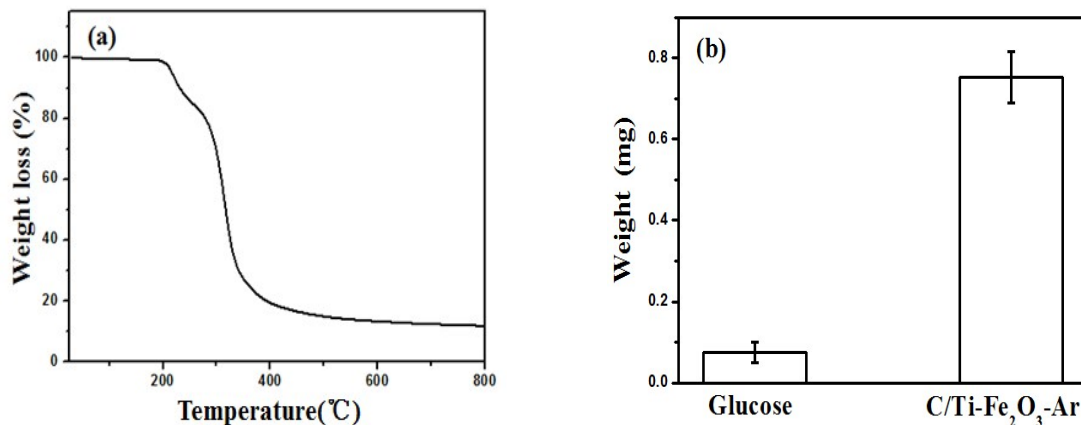

**Fig. S1** (a) The TGA curves of glucose in N<sub>2</sub>; (b) The weight of glucose and C/Ti-Fe<sub>2</sub>O<sub>3</sub>-Ar on per square centimeter of Ti foil substrate.

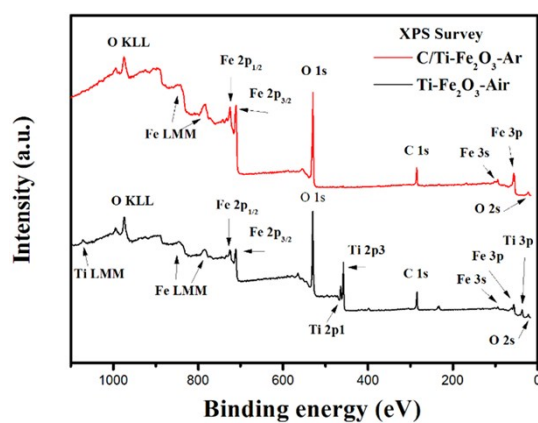

**Fig. S2** The general survey XPS spectra of the C/Ti-Fe<sub>2</sub>O<sub>3</sub>-Ar and Ti-Fe<sub>2</sub>O<sub>3</sub>-Air.

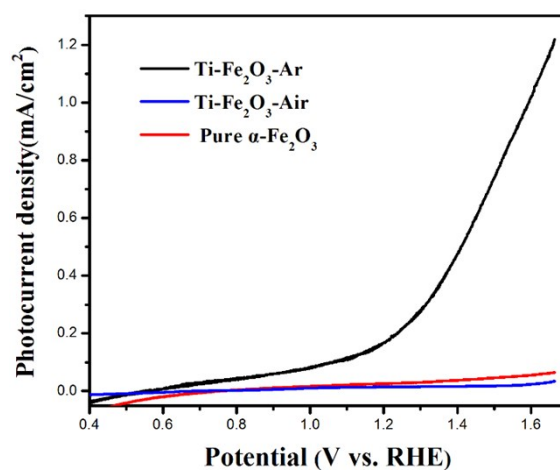

**Fig. S3** LSV measurements for the Pure  $\alpha$ -Fe<sub>2</sub>O<sub>3</sub>, Ti-Fe<sub>2</sub>O<sub>3</sub>-Air and Ti-Fe<sub>2</sub>O<sub>3</sub>-Ar photoanodes.

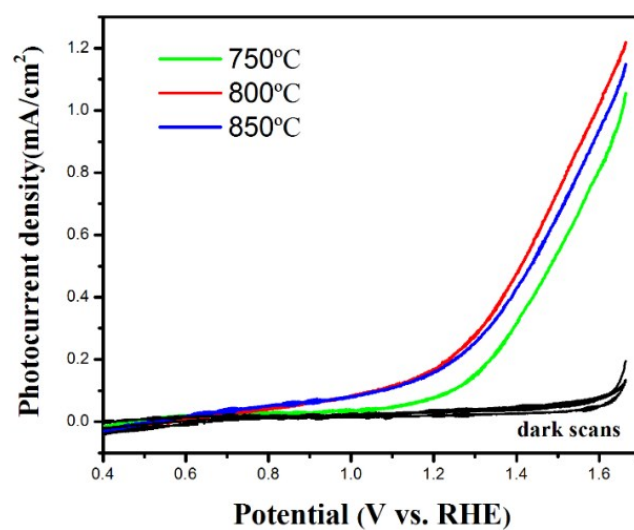

**Fig. S4** LSV measurements for the Ti-Fe<sub>2</sub>O<sub>3</sub>-Ar synthesized with different annealing temperatures in argon

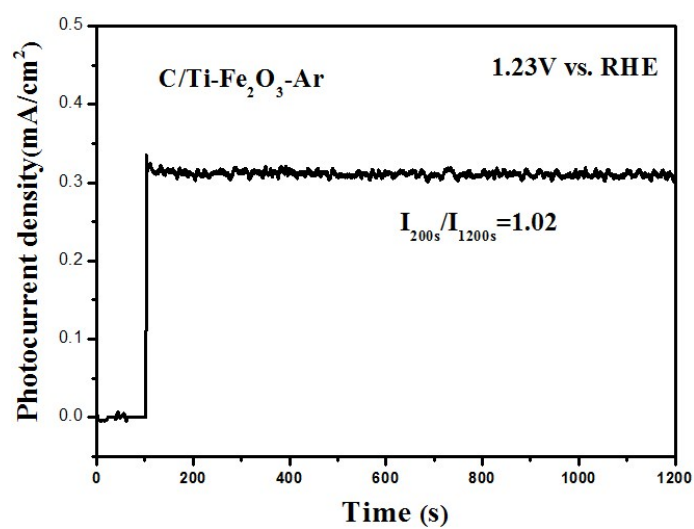

**Fig. S5** Transient photocurrent responses of the C/Ti-Fe<sub>2</sub>O<sub>3</sub>-Ar under simulated sunlight irradiation at 1.23 V.

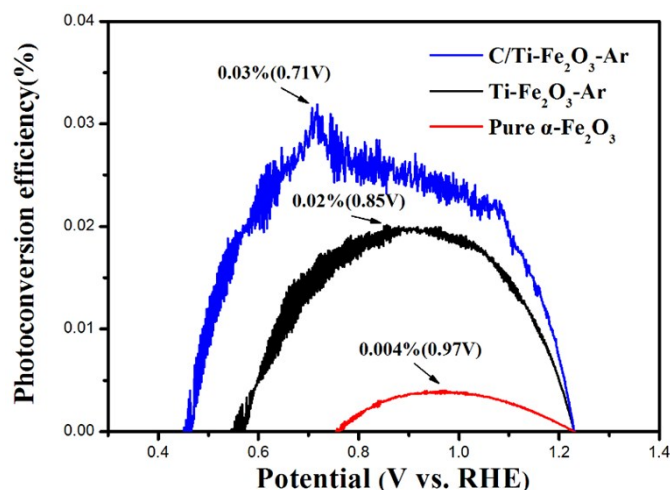

**Fig. S6** The Photoconversion efficiency of the C/Ti-Fe<sub>2</sub>O<sub>3</sub>-Ar, Ti-Fe<sub>2</sub>O<sub>3</sub>-Ar and Pure  $\alpha$ -Fe<sub>2</sub>O<sub>3</sub>.

Photoconversion efficiency,  $\eta$ , which is the light energy to chemical energy conversion efficiency, is calculated as:

$$\eta = j_p \times (1.23 - |V|) / I_0$$

where  $V$  is the bias potential vs. RHE,  $j_p$  is the photocurrent density at the measured potential, and  $I_0$  is the power density of incident light.

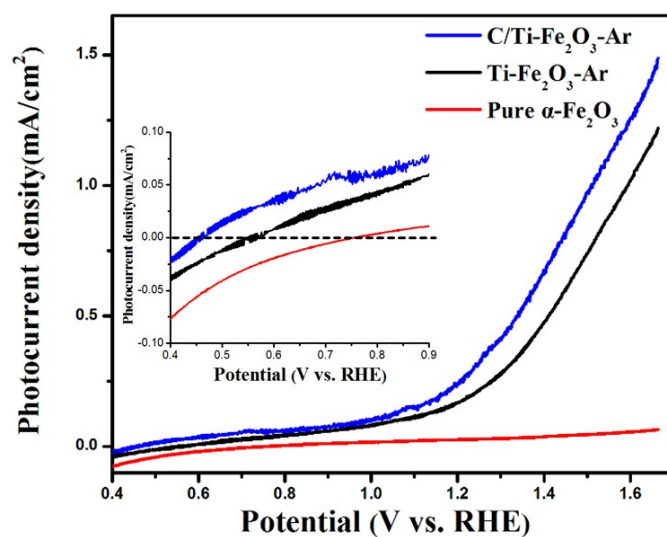

**Fig. S7** LSV measurements for the C/Ti-Fe<sub>2</sub>O<sub>3</sub>-Ar (blue), Ti-Fe<sub>2</sub>O<sub>3</sub>-Ar (black) and Pure  $\alpha$ -Fe<sub>2</sub>O<sub>3</sub> (red) irradiated with simulated sunlight. The inset are the highlighted onset potentials.
